# Supplementary material for: Effect Modification of Sex and Age for the Hospital Volume‐Outcome Relationship in Abdominal Aortic Aneurysm Treatment: Secondary Data Analysis of the Nationwide German Diagnosis Related Groups Statistics From 2005 to 2014
Source: PubMed Central journal article supplement — J Am Heart Assoc. 2020 Mar 14;9(6):e014534. doi: 10.1161/JAHA.119.014534 (PMC7335519; doi:10.1161/jaha.119.014534), 2020-03-14
Supplement: JAH3-9-e014534-s001.pdf [file JAH3-9-e014534-s001.pdf]

# **SUPPLEMENTAL MATERIAL**

**Table S1. Codes for operations/procedures (OPS) and diagnosis (ICD-10-GM; source: [www.dimdi.de](http://www.dimdi.de)).**

| <b>Description</b>                                    | <b>Source</b>    | <b>Codes, reference</b>                                       |
|-------------------------------------------------------|------------------|---------------------------------------------------------------|
| rAAA                                                  | ICD-10           | I71.3                                                         |
| iAAA                                                  | ICD-10           | I71.4                                                         |
| OAR                                                   | OPS              | 5-384.5*, 5-384.7*                                            |
| EVAR                                                  | OPS              | 5-38a.1*                                                      |
| <b><i>Characteristics and secondary diagnosis</i></b> |                  |                                                               |
| Elixhauser score (ES)                                 | Literature       | van Walraven et al. <sup>22</sup> , Quan et al. <sup>21</sup> |
| Chronic ischemic heart disease                        | ICD-10           | I25*                                                          |
| Peripheral vascular disease                           | ES <sup>21</sup> | Elixhauser Item No. 5                                         |
| Chronic pulmonary disease                             | ES <sup>21</sup> | Elixhauser Item No. 9                                         |
| Diabetes                                              | ES <sup>21</sup> | Elixhauser Item No. 10 and 11                                 |
| Renal disease                                         | ES <sup>21</sup> | Elixhauser Item No. 13                                        |
| Malignancy                                            | ES <sup>21</sup> | Elixhauser Item No. 17, 18 and 19                             |

iAAA= intact abdominal aortic aneurism, rAAA= ruptured abdominal aortic aneurism, OAR= open aortic repair, EVAR= endovascular aortic repair, ES=Elixhauser score

**Table S2. Median AAA caseload of hospitals for OAR and EVAR and limits of hospital quartiles.**

| Unit of Analysis:<br>Hospital | Volume OAR |    |    | Volume EVAR |    |    |
|-------------------------------|------------|----|----|-------------|----|----|
|                               | Median     | Q1 | Q4 | Median      | Q1 | Q4 |
| 2005                          | 7          | 3  | 15 | 6           | 3  | 13 |
| 2006                          | 7          | 3  | 14 | 6           | 3  | 13 |
| 2007                          | 7          | 3  | 15 | 6           | 3  | 13 |
| 2008                          | 6          | 3  | 14 | 7           | 3  | 15 |
| 2009                          | 7          | 3  | 13 | 9           | 4  | 18 |
| 2010                          | 6          | 3  | 11 | 11          | 4  | 19 |
| 2011                          | 5          | 2  | 11 | 12          | 6  | 21 |
| 2012                          | 5          | 2  | 10 | 12          | 5  | 23 |
| 2013                          | 4          | 2  | 9  | 14          | 6  | 24 |
| 2014                          | 4          | 2  | 10 | 13          | 6  | 23 |

AAA= abdominal aortic aneurysm, OAR= open aortic repair, EVAR= endovascular aortic repair

**Table S3. Number of hospitals per volume quartile and year (for quartile distribution see Table S2).**

| Unit of Analysis:<br>Hospital | Volume OAR |     |     |     |  | Volume EVAR |     |     |     |
|-------------------------------|------------|-----|-----|-----|--|-------------|-----|-----|-----|
| Quartile:                     | Q1         | Q2  | Q3  | Q4  |  | Q1          | Q2  | Q3  | Q4  |
| 2005                          | 106        | 105 | 111 | 157 |  | 108         | 61  | 35  | 29  |
| 2006                          | 107        | 84  | 125 | 143 |  | 112         | 74  | 62  | 27  |
| 2007                          | 118        | 103 | 106 | 151 |  | 116         | 97  | 59  | 41  |
| 2008                          | 108        | 103 | 111 | 142 |  | 118         | 94  | 84  | 55  |
| 2009                          | 103        | 100 | 109 | 132 |  | 111         | 108 | 81  | 84  |
| 2010                          | 101        | 106 | 127 | 111 |  | 106         | 95  | 121 | 81  |
| 2011                          | 109        | 108 | 105 | 101 |  | 86          | 109 | 107 | 105 |
| 2012                          | 130        | 100 | 114 | 84  |  | 100         | 95  | 112 | 124 |
| 2013                          | 121        | 103 | 87  | 76  |  | 63          | 98  | 125 | 130 |
| 2014                          | 126        | 106 | 91  | 74  |  | 80          | 103 | 112 | 140 |

OAR= open aortic repair, EVAR= endovascular aortic repair

**Table S4. Observed in-hospital mortality after AAA repair between 2005 and 2014 and predicted mortality within the used mathematical model.**

| <b>Mortality</b>                     | <b>Observed</b> | <b>Predicted</b> |
|--------------------------------------|-----------------|------------------|
|                                      | Mean            | Mean             |
| <b>all</b>                           | 0.03            | 0.03             |
| <b>Age-set</b>                       |                 |                  |
| >79                                  | 0.05            | 0.05             |
| 75-79                                | 0.04            | 0.04             |
| 70-74                                | 0.03            | 0.03             |
| 65-69                                | 0.02            | 0.02             |
| <65                                  | 0.01            | 0.01             |
| <b>Binned annual hospital volume</b> |                 |                  |
| 1-10                                 | 0.05            | 0.05             |
| 11-20                                | 0.04            | 0.04             |
| 21-30                                | 0.03            | 0.03             |
| 31-40                                | 0.03            | 0.03             |
| 41-50                                | 0.03            | 0.03             |
| >50                                  | 0.02            | 0.02             |
| <b>Sex</b>                           |                 |                  |
| male                                 | 0.03            | 0.03             |
| female                               | 0.05            | 0.05             |
| <b>Procedure</b>                     |                 |                  |
| OAR                                  | 0.05            | 0.05             |
| EVAR                                 | 0.02            | 0.02             |

AAA= abdominal aortic aneurysm, OAR= open aortic repair, EVAR= endovascular aortic repair

**Table S5. Crosstable of observed in-hospital mortality after AAA repair between 2005 and 2014 and predicted mortality within the used mathematical model.**

|      |         |        | Observed | Predicted |       |        |         |        | Observed | Predicted |
|------|---------|--------|----------|-----------|-------|--------|---------|--------|----------|-----------|
| Sex  | Age-set | Volume | Mean     | Mean      |       | Sex    | Age-set | Volume | Mean     | Mean      |
| male | >79     | 1-10   | 0.08     | 0.08      |       | female | >79     | 1-10   | 0.1      | 0.1       |
|      |         | 11-20  | 0.05     | 0.06      |       |        |         | 11-20  | 0.07     | 0.07      |
|      |         | 21-30  | 0.06     | 0.05      |       |        |         | 21-30  | 0.07     | 0.07      |
|      |         | 31-40  | 0.05     | 0.05      |       |        |         | 31-40  | 0.06     | 0.07      |
|      |         | 41-50  | 0.05     | 0.05      |       |        |         | 41-50  | 0.06     | 0.06      |
|      |         | >50    | 0.04     | 0.04      |       |        |         | >50    | 0.05     | 0.05      |
|      | 75-79   | 1-10   | 0.06     | 0.06      |       | 75-79  | 1-10    | 0.05   | 0.07     |           |
|      |         | 11-20  | 0.06     | 0.04      |       |        | 11-20   | 0.06   | 0.06     |           |
|      |         | 21-30  | 0.04     | 0.04      |       |        | 21-30   | 0.07   | 0.06     |           |
|      |         | 31-40  | 0.04     | 0.04      |       |        | 31-40   | 0.05   | 0.05     |           |
|      |         | 41-50  | 0.03     | 0.03      |       |        | 41-50   | 0.04   | 0.05     |           |
|      |         | >50    | 0.03     | 0.03      |       |        | >50     | 0.04   | 0.04     |           |
|      | 70-74   | 1-10   | 0.04     | 0.04      |       | 70-74  | 1-10    | 0.05   | 0.05     |           |
|      |         | 11-20  | 0.03     | 0.03      |       |        | 11-20   | 0.06   | 0.05     |           |
|      |         | 21-30  | 0.03     | 0.03      |       |        | 21-30   | 0.03   | 0.04     |           |
|      |         | 31-40  | 0.03     | 0.03      |       |        | 31-40   | 0.05   | 0.05     |           |
|      |         | 41-50  | 0.02     | 0.03      |       |        | 41-50   | 0.05   | 0.04     |           |
|      |         | >50    | 0.02     | 0.02      |       |        | >50     | 0.03   | 0.04     |           |
|      | 65-69   | 1-10   | 0.03     | 0.03      |       | 65-69  | 1-10    | 0.06   | 0.04     |           |
|      |         | 11-20  | 0.02     | 0.02      |       |        | 11-20   | 0.04   | 0.04     |           |
|      |         | 21-30  | 0.02     | 0.02      |       |        | 21-30   | 0.04   | 0.04     |           |
|      |         | 31-40  | 0.02     | 0.02      |       |        | 31-40   | 0.04   | 0.04     |           |
|      |         | 41-50  | 0.02     | 0.02      |       |        | 41-50   | 0.05   | 0.04     |           |
|      |         | >50    | 0.01     | 0.02      |       |        | >50     | 0.04   | 0.03     |           |
| <65  | 1-10    | 0.02   | 0.02     | <65       | 1-10  | 0.02   | 0.03    |        |          |           |
|      | 11-20   | 0.02   | 0.01     |           | 11-20 | 0.01   | 0.03    |        |          |           |
|      | 21-30   | 0.01   | 0.01     |           | 21-30 | 0.03   | 0.02    |        |          |           |
|      | 31-40   | 0.01   | 0.01     |           | 31-40 | 0.01   | 0.02    |        |          |           |
|      | 41-50   | 0.01   | 0.01     |           | 41-50 | 0.02   | 0.02    |        |          |           |
|      | >50     | 0.01   | 0.01     |           | >50   | 0.02   | 0.02    |        |          |           |

AAA= abdominal aortic aneurysm
